## Long-term effectiveness of a nurse-led 7-step transitional intervention programme in heart failure

L. Alcobero<sup>1</sup>, J. Vime<sup>1</sup>, C. Enjuanes<sup>1</sup>, S. Jimenez<sup>1</sup>, A. Garay<sup>1</sup>, S. Yun<sup>1</sup>, P. Moliner<sup>1</sup>, C. Guerrero<sup>1</sup>, C. Hidalgo<sup>1</sup>, E. Calero<sup>1</sup>, R. Marin<sup>1</sup>, L. Alcobero<sup>2</sup>, C. Delso<sup>2</sup>, J. Comin<sup>1</sup>

<sup>1</sup>University Hospital of Bellvitge, Hospitalet De Llobregat, Spain; <sup>2</sup>Delta Primary Care Service, ICS, Hospitalet de Llobregat, Spain

**Funding Acknowledgement:** Type of funding source: Public hospital(s). Main funding source(s): Hospital Universitari de Bellvitge

**Background:** Reduction of 30-day readmission in heart failure (HF) patients is a main goal of health-care systems. Programmes to decrease 30-day readmission have successfully reduced it but have failed to neither maintain benefit afterwards nor decrease mortality. Moreover, in many cases the price of reducing 30-day readmission is a mortality increase.

**Purpose:** Evaluate whether the impact of a fully nurse-led HF programme directed to reduce 30-day readmission and mortality extends to longer periods of time, including 90 days and 180 days after discharge.

**Methods:** We evaluated all patients discharged from hospital with HF as primary diagnosis between January 2017 and January 2019. We compared outcomes between patients discharged during Period #1 (pre-programme; Jan 2017 - Aug 2017) and those discharged during Period #2 (HF programme; Sept 2017 - Jan 2019).

Primary endpoint was the combined endpoint of all-cause death or all-cause hospitalization 90 days and 180 days after discharge from the index hospitalization.

**Results:** The study enrolled 440 patients: 123 in Period #1 and 317 in

Period #2.

Mean age was 75±9 years. There was a higher proportion of female patients in Period #2 (38.2% vs 26.8%, p=0.025), with no differences in other baseline characteristics.

The combined endpoint of all cause-death and all-cause hospitalization was significantly reduced in patients in the HF programme group, both at 90 days [OR 0.37 (0.22–0.63), p<0.001] and at 180 days [OR 0.27 (CI 0.17–0.43), p<0.001]. Such a decrease was at expense of a reduction in cardiovascular (CV) hospitalization and HF hospitalization.

There were no differences between groups in mortality [OR 0.96 (0.18–5.00), p=0.293].

**Conclusions:** A fully nurse-led HF programme reduces the combined endpoint of all-cause death and all-cause hospitalization both at 90 days and 180 days after an index discharge for HF.

Such a decrease is driven by a reduction of CV and HF hospitalization, which are maintained over time. There were no differences between groups in mortality.

|                                    | 90 Days          |        | 180 Days         |        |
|------------------------------------|------------------|--------|------------------|--------|
|                                    | OR (CI)          | p      | OR (CI)          | p      |
| All-cause death or hospitalization | 0.36 (0.22–0.59) | <0.001 | 0.29 (0.18–0.45) | <0.001 |
| All-cause hospitalization          | 0.35 (0.21–0.58) | <0.001 | 0.28 (0.18–0.43) | <0.001 |
| HF hospitalization                 | 0.19 (0.11–0.35) | <0.001 | 0.17 (0.10–0.28) | <0.001 |
| CV hospitalization                 | 0.21 (0.12–0.37) | <0.001 | 0.18 (0.11–0.29) | <0.001 |
| All-cause death                    | 0.96 (0.18–5.00) | 0.960  | 0.53 (0.16–1.69) | 0.293  |

OR: odds ratio; CI: confidence interval; HF: heart failure; CV: cardiovascular.

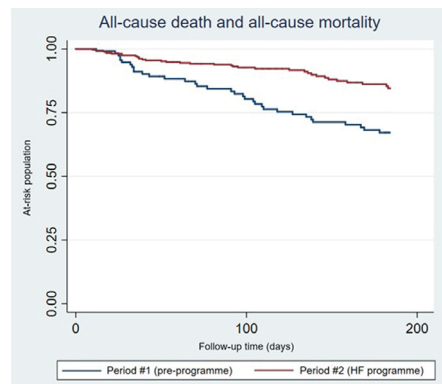

Source: http://academic.oup.com/eurheartj/article-pdf/41/Supplement_2/ehaa946.1124/34522053/ehaa946.1124.pdf
